# Supplementary material for: Adult Health Outcomes of Childhood Bullying Victimization: Evidence From a Five-Decade Longitudinal British Birth Cohort
Source: Atypon-hosted journal article supplement (doi:10.1176/appi.ajp.2014.13101401), 2014-04-18
Supplement: 777_ds001.pdf [file 777_ds001.pdf]

Data Supplement for Adult Health Outcomes of Childhood Bullying Victimization: Evidence From A 5-Decade Longitudinal British Cohort

Table S1. Participation rates in NCDS according to childhood bullying victimization.

| Been bullied | Age 7 &11 |      | Age 23 |      | Age 45 |      | Age 50 |      |
|--------------|-----------|------|--------|------|--------|------|--------|------|
|              | N         | %    | N      | %    | N      | %    | N      | %    |
| Never        | 9233      | 57.9 | 6850   | 57.7 | 5215   | 58.5 | 5450   | 58.7 |
| Occasionally | 4411      | 27.7 | 3276   | 27.6 | 2426   | 27.2 | 2537   | 27.3 |
| Frequently   | 2302      | 14.4 | 1744   | 14.7 | 1274   | 14.3 | 1300   | 14.0 |
| Missing      | -         | -    | 667    | -    | 462    | -    | 503    | -    |

Table S2. Being bullied in childhood and adult health outcomes

| Adult health outcomes              | Bullied at age 7 & 11 |      |                          |      |                        |      |
|------------------------------------|-----------------------|------|--------------------------|------|------------------------|------|
|                                    | Never<br>(N=4557)     |      | Occasionally<br>(N=2128) |      | Frequently<br>(N=1086) |      |
|                                    | Mean                  | SD   | Mean                     | SD   | Mean                   | SD   |
| Psychological distress at age 23   | 1.07                  | 1.46 | 1.34                     | 1.56 | 1.52                   | 1.76 |
| Psychological distress at age 50   | 1.35                  | 1.86 | 1.65                     | 2.00 | 1.76                   | 2.15 |
|                                    | N                     | %    | N                        | %    | N                      | %    |
| Psychiatric outcomes at age 45     |                       |      |                          |      |                        |      |
| Depression or anxiety disorders    | 287                   | 5.8  | 159                      | 7.0  | 109                    | 9.4  |
| Depression                         | 91                    | 1.6  | 57                       | 2.7  | 32                     | 3.0  |
| Any anxiety disorders              | 225                   | 4.6  | 120                      | 5.2  | 85                     | 7.2  |
| Suicidality                        | 86                    | 1.8  | 52                       | 2.5  | 42                     | 3.7  |
| Alcohol dependence                 | 321                   | 6.9  | 136                      | 6.7  | 65                     | 5.9  |
|                                    | Mean                  | SD   | Mean                     | SD   | Mean                   | SD   |
| General health at age 23 (z-score) | -0.10                 | 0.94 | 0.05                     | 1.02 | 0.10                   | 1.03 |
| General health at age 50 (z-score) | -0.07                 | 0.98 | 0.08                     | 1.00 | 0.20                   | 1.01 |
| Cognitive functioning at age 50    | 5.42                  | 2.00 | 5.17                     | 2.10 | 5.00                   | 2.04 |

Abbreviations: SD, standard deviation.

Notes: We reported unweighted n, but weighted %, mean and standard deviation.

All estimates of associations controlled for gender.

Table S3. Association between being bullied in childhood and adult mental health outcomes controlling for all confounders separately

|                                           |              | Controlling for |              |                      |              |                          |              |                        |              |                        |              |
|-------------------------------------------|--------------|-----------------|--------------|----------------------|--------------|--------------------------|--------------|------------------------|--------------|------------------------|--------------|
|                                           |              | Childhood IQ    |              | Parents social class |              | Low parental involvement |              | Internalizing problems |              | Externalizing problems |              |
|                                           |              | OR              | (95%CI)      | OR                   | (95%CI)      | OR                       | (95%CI)      | OR                     | (95%CI)      | OR                     | (95%CI)      |
| Psychological distress at age 23          |              |                 |              |                      |              |                          |              |                        |              |                        |              |
| Bullied                                   | Occasionally | <b>1.43</b>     | (1.28, 1.58) | <b>1.48</b>          | (1.33, 1.64) | <b>1.45</b>              | (1.30, 1.60) | <b>1.46</b>            | (1.32, 1.62) | <b>1.49</b>            | (1.34, 1.65) |
|                                           | Frequently   | <b>1.66</b>     | (1.45, 1.89) | <b>1.76</b>          | (1.54, 2.01) | <b>1.70</b>              | (1.49, 1.95) | <b>1.72</b>            | (1.50, 1.96) | <b>1.75</b>            | (1.54, 2.00) |
| Gender                                    |              | <b>3.11</b>     | (2.83, 3.41) | <b>2.88</b>          | (2.63, 3.16) | <b>2.97</b>              | (2.71, 3.26) | <b>3.00</b>            | (2.73, 3.29) | <b>3.08</b>            | (2.81, 3.38) |
| Confounders                               |              | <b>0.98</b>     | (0.97, 0.98) | <b>1.19</b>          | (1.14, 1.24) | <b>1.23</b>              | (1.19, 1.27) | <b>1.22</b>            | (1.15, 1.28) | <b>1.25</b>            | (1.19, 1.31) |
| Psychological distress at age 50          |              |                 |              |                      |              |                          |              |                        |              |                        |              |
| Bullied                                   | Occasionally | <b>1.35</b>     | (1.22, 1.49) | <b>1.38</b>          | (1.25, 1.53) | <b>1.36</b>              | (1.23, 1.51) | <b>1.36</b>            | (1.23, 1.51) | <b>1.38</b>            | (1.24, 1.53) |
|                                           | Frequently   | <b>1.41</b>     | (1.23, 1.61) | <b>1.47</b>          | (1.28, 1.68) | <b>1.43</b>              | (1.25, 1.63) | <b>1.44</b>            | (1.26, 1.64) | <b>1.46</b>            | (1.28, 1.67) |
| Gender                                    |              | <b>1.90</b>     | (1.73, 2.07) | <b>1.82</b>          | (1.67, 1.99) | <b>1.84</b>              | (1.68, 2.01) | <b>1.86</b>            | (1.70, 2.04) | <b>1.89</b>            | (1.72, 2.06) |
| Confounders                               |              | <b>0.99</b>     | (0.98, 0.99) | <b>1.08</b>          | (1.04, 1.12) | <b>1.11</b>              | (1.08, 1.15) | <b>1.13</b>            | (1.07, 1.19) | <b>1.13</b>            | (1.07, 1.18) |
| Depression or anxiety disorders at age 45 |              |                 |              |                      |              |                          |              |                        |              |                        |              |
| Bullied                                   | Occasionally | 1.18            | (0.94, 1.47) | 1.23                 | (0.99, 1.53) | 1.20                     | (0.97, 1.50) | 1.19                   | (0.96, 1.49) | 1.22                   | (0.98, 1.52) |
|                                           | Frequently   | <b>1.59</b>     | (1.24, 2.04) | <b>1.71</b>          | (1.34, 2.19) | <b>1.65</b>              | (1.29, 2.12) | <b>1.61</b>            | (1.25, 2.07) | <b>1.69</b>            | (1.32, 2.17) |
| Gender                                    |              | <b>1.71</b>     | (1.41, 2.07) | <b>1.61</b>          | (1.33, 1.95) | <b>1.63</b>              | (1.35, 1.98) | <b>1.71</b>            | (1.41, 2.07) | <b>1.70</b>            | (1.40, 2.06) |
| Confounders                               |              | <b>0.98</b>     | (0.97, 0.98) | <b>1.13</b>          | (1.03, 1.24) | <b>1.15</b>              | (1.08, 1.22) | <b>1.35</b>            | (1.23, 1.49) | <b>1.19</b>            | (1.09, 1.30) |
| Depression at age 45                      |              |                 |              |                      |              |                          |              |                        |              |                        |              |
| Bullied                                   | Occasionally | <b>1.61</b>     | (1.12, 2.33) | <b>1.70</b>          | (1.18, 2.45) | <b>1.63</b>              | (1.14, 2.34) | <b>1.63</b>            | (1.13, 2.35) | 1.68                   | (1.17, 2.42) |
|                                           | Frequently   | <b>1.76</b>     | (1.15, 2.71) | <b>1.93</b>          | (1.25, 2.96) | <b>1.80</b>              | (1.17, 2.78) | <b>1.77</b>            | (1.15, 2.72) | <b>1.88</b>            | (1.22, 2.89) |
| Gender                                    |              | <b>1.97</b>     | (1.41, 2.76) | <b>1.88</b>          | (1.34, 2.63) | <b>1.90</b>              | (1.36, 2.67) | <b>1.99</b>            | (1.42, 2.78) | <b>1.97</b>            | (1.40, 2.79) |
| Confounders                               |              | <b>0.98</b>     | (0.97, 0.99) | 1.05                 | (0.90, 1.24) | <b>1.19</b>              | (1.08, 1.32) | <b>1.38</b>            | (1.17, 1.63) | <b>1.19</b>            | (1.02, 1.38) |

Any anxiety disorders at age 45

|             |              |             |              |             |              |             |              |             |              |             |              |
|-------------|--------------|-------------|--------------|-------------|--------------|-------------|--------------|-------------|--------------|-------------|--------------|
| Bullied     | Occasionally | 1.08        | (0.84, 1.39) | 1.12        | (0.87, 1.44) | 1.10        | (0.86, 1.42) | 1.10        | (0.85, 1.41) | 1.12        | (0.87, 1.44) |
|             | Frequently   | <b>1.50</b> | (1.13, 1.98) | <b>1.61</b> | (1.21, 2.12) | <b>1.56</b> | (1.18, 2.07) | <b>1.52</b> | (1.15, 2.02) | <b>1.60</b> | (1.21, 2.11) |
| Gender      |              | <b>1.58</b> | (1.27, 1.96) | <b>1.49</b> | (1.20, 1.85) | <b>1.51</b> | (1.22, 1.87) | <b>1.57</b> | (1.26, 1.95) | <b>1.56</b> | (1.26, 1.95) |
| Confounders |              | <b>0.98</b> | (0.97, 0.98) | <b>1.15</b> | (1.04, 1.28) | <b>1.14</b> | (1.07, 1.22) | <b>1.32</b> | (1.18, 1.46) | <b>1.18</b> | (1.06, 1.30) |

Suicidality at age 45

|             |              |             |              |             |              |             |              |             |              |             |              |
|-------------|--------------|-------------|--------------|-------------|--------------|-------------|--------------|-------------|--------------|-------------|--------------|
| Bullied     | Occasionally | 1.30        | (0.89, 1.92) | 1.40        | (0.95, 2.05) | 1.33        | (0.91, 1.96) | 1.35        | (0.92, 1.98) | 1.40        | (0.95, 2.05) |
|             | Frequently   | <b>1.85</b> | (1.22, 2.81) | <b>2.09</b> | (1.39, 3.15) | <b>1.94</b> | (1.29, 2.93) | <b>1.91</b> | (1.26, 2.99) | <b>2.08</b> | (1.38, 3.13) |
| Gender      |              | <b>1.70</b> | (1.22, 2.37) | <b>1.54</b> | (1.11, 2.15) | <b>1.59</b> | (1.14, 2.22) | <b>1.68</b> | (1.20, 2.34) | <b>1.68</b> | (1.20, 2.37) |
| Confounders |              | <b>0.96</b> | (0.95, 0.97) | <b>1.33</b> | (1.13, 1.56) | <b>1.31</b> | (1.19, 1.43) | <b>1.61</b> | (1.38, 1.89) | <b>1.31</b> | (1.12, 1.53) |

---

Abbreviations: OR, Odds Ratio; 95%CI, 95% Confidence Interval.

Significant findings are reported in bold
